# Supplementary material for: Prevalence of psychopathy in a community sample of Spanish adults: Definitions and measurements matter
Source: Frontiers journal article supplement (doi:10.3389/fpsyg.2022.997303), 2022-10-28
Supplement: Data_Sheet_1.PDF [file Data_Sheet_1.PDF]

## **ANNEX**

### **Prevalence of Psychopathy in a Community Sample of Spanish Adults: Definitions and Measurements Matter**

Ana Sanz García

María Elena Peña Fernández

María Paz García-Vera

Jesús Sanz

Universidad Complutense de Madrid

Spain

**Table 1A**

*Main results of the meta-analyses or joint analyses of several studies on the relationships of psychopathy with NEO PI-R facets*

|                            | O'Boyle et al.<br>(2015)                                      | Decuyper et al.<br>(2009)                             | Lynam &<br>Miller (2015)                     |
|----------------------------|---------------------------------------------------------------|-------------------------------------------------------|----------------------------------------------|
| NEO PI-R facets            | Meta-analysis of<br>76-86 studies<br><i>N</i> = 23 216-25 465 | Meta-analysis de<br>24-25 studies<br><i>N</i> = n. d. | Analysis of 3<br>studies<br><i>N</i> = 1 482 |
| Neuroticism                |                                                               |                                                       |                                              |
| Anxiety                    | -.03                                                          | -.15                                                  | <b>-.20</b>                                  |
| <b>Angry Hostility</b>     | <b>.37</b>                                                    | <b>.29</b>                                            | <b>.29</b>                                   |
| Depression                 | .10                                                           | .05                                                   | .04                                          |
| Self-Consciousness         | -.01                                                          | -.09                                                  | -.11                                         |
| <b>Impulsivity</b>         | <b>.39</b>                                                    | <b>.24</b>                                            | <b>.21</b>                                   |
| Vulnerability              | .08                                                           | .00                                                   | .03                                          |
| Extraversion               |                                                               |                                                       |                                              |
| <b>Warmth</b>              | <b>-.24</b>                                                   | <b>-.20</b>                                           | <b>-.22</b>                                  |
| Gregariousness             | .00                                                           | .03                                                   | .05                                          |
| Assertiveness              | .09                                                           | .16                                                   | .19                                          |
| Activity                   | .06                                                           | .07                                                   | .04                                          |
| <b>Excitement-Seeking</b>  | <b>.28</b>                                                    | <b>.31</b>                                            | <b>.24</b>                                   |
| Positive Emotions          | -.17                                                          | -.10                                                  | -.19                                         |
| Openness to Experience     |                                                               |                                                       |                                              |
| Fantasy                    | .09                                                           | .05                                                   | .01                                          |
| Aesthetics                 | -.04                                                          | -.01                                                  | -.05                                         |
| Feelings                   | -.07                                                          | -.10                                                  | -.19                                         |
| Actions                    | .09                                                           | .09                                                   | .14                                          |
| Ideas                      | .04                                                           | .03                                                   | -.02                                         |
| Values                     | .06                                                           | .00                                                   | -.09                                         |
| Agreeableness              |                                                               |                                                       |                                              |
| <b>Trust</b>               | <b>-.35</b>                                                   | <b>-.34</b>                                           | <b>-.29</b>                                  |
| <b>Straightforwardness</b> | <b>-.56</b>                                                   | <b>-.61</b>                                           | <b>-.58</b>                                  |

|                          | O'Boyle et al.<br>(2015)                                      | Decuyper et al.<br>(2009)                             | Lynam &<br>Miller (2015)                     |
|--------------------------|---------------------------------------------------------------|-------------------------------------------------------|----------------------------------------------|
| NEO PI-R facets          | Meta-analysis of<br>76-86 studies<br><i>N</i> = 23 216-25 465 | Meta-analysis de<br>24-25 studies<br><i>N</i> = n. d. | Analysis of 3<br>studies<br><i>N</i> = 1 482 |
| <b>Altruism</b>          | <b>-.40</b>                                                   | <b>-.41</b>                                           | <b>-.47</b>                                  |
| <b>Compliance</b>        | <b>-.47</b>                                                   | <b>-.48</b>                                           | <b>-.42</b>                                  |
| <b>Modesty</b>           | <b>-.25</b>                                                   | <b>-.32</b>                                           | <b>-.38</b>                                  |
| <b>Tender-Mindedness</b> | <b>-.36</b>                                                   | <b>-.31</b>                                           | <b>-.33</b>                                  |
| Conscientiousness        |                                                               |                                                       |                                              |
| Competence               | <b>-.23</b>                                                   | -.17                                                  | <b>-.29</b>                                  |
| Order                    | <b>-.25</b>                                                   | -.17                                                  | <b>-.20</b>                                  |
| <b>Dutifulness</b>       | <b>-.41</b>                                                   | <b>-.32</b>                                           | <b>-.35</b>                                  |
| Achievement Striving     | <b>-.26</b>                                                   | -.11                                                  | -.17                                         |
| <b>Self-Discipline</b>   | <b>-.31</b>                                                   | <b>-.22</b>                                           | <b>-.24</b>                                  |
| <b>Deliberation</b>      | <b>-.46</b>                                                   | <b>-.38</b>                                           | <b>-.46</b>                                  |

*Note.* Statistically significant correlations of at least  $p < .05$  are presented in boldface. The NEO

PI-R facets that present significant correlations with psychopathy in the three works are presented in bold. n. d. = no data in the published article.

**Table 2A**

*Correspondence between the personality traits of psychopathy measured by PCL-R and the NEO PI-R facets based on the content analysis of Widiger and Lynam (1998) (adapted from Derefinko & Lynam, 2013, p. 105)*

| PCL-R Subfactors                                     | NEO PI-R Facets                |
|------------------------------------------------------|--------------------------------|
| <b>Subfactor 1: Interpersonal</b>                    |                                |
| 1. Glibness/superficial charm                        | Self-Consciousness (-)         |
| 2. Grandiose sense of self-worth                     | <b>Modesty (-)</b>             |
| 4. Pathological lying                                | <b>Straightforwardness (-)</b> |
| 5. Conning/manipulative                              | <b>Straightforwardness (-)</b> |
|                                                      | <b>Altruism (-)</b>            |
|                                                      | <b>Tender-Mindedness (-)</b>   |
| <b>Subfactor 2: Affective</b>                        |                                |
| 6. Lack of remorse or guilt                          | <b>Tender-Mindedness (-)</b>   |
| 7. Emotional shallow                                 | <b>Warmth (-)</b>              |
|                                                      | Positive Emotions (-)          |
|                                                      | <b>Altruism (-)</b>            |
|                                                      | <b>Tender-Mindedness (-)</b>   |
| 8. Callous/lack of empathy                           | <b>Modesty (-)</b>             |
|                                                      | <b>Tender-Mindedness (-)</b>   |
| 16. Failure to accept responsibility for own actions | <b>Trust (-)</b>               |
|                                                      | <b>Compliance (-)</b>          |
|                                                      | <b>Tender-Mindedness (-)</b>   |
|                                                      | <b>Dutifulness (-)</b>         |
| <b>Subfactor 3: Lifestyle</b>                        |                                |
| 3. Need of stimulation/proneness to boredom          | <b>Excitement-Seeking (+)</b>  |
|                                                      | <b>Self-Discipline (-)</b>     |
| 13. Lack of realistic, long-term goals               | Achievement Striving (-)       |
|                                                      | <b>Self-Discipline (-)</b>     |
|                                                      | <b>Deliberation (-)</b>        |
| 14. Impulsivity                                      | <b>Impulsivity (+)</b>         |
|                                                      | <b>Deliberation (-)</b>        |

| PCL-R Subfactors            | NEO PI-R Facets                                                         |
|-----------------------------|-------------------------------------------------------------------------|
| 15. Irresponsibility        | <b>Dutifulness (-)</b>                                                  |
| Subfactor 4: Antisocial     |                                                                         |
| 10. Poor behavioral control | Angry Hostility (+)<br><b>Deliberation (-)</b><br><b>Compliance (-)</b> |

*Note.* The items of the PCL-R that measure behaviors rather than personality traits are not included: items that measure a parasitic lifestyle (Item 9), early behavioral problems (Item 12), juvenile delinquency (Item 18), revocation of conditional release (Item 19), and criminal versatility (Item 20). The NEO PI-R facets that, according to the results of Lynam et al. (2018), coincide with the prototype of the psychopath according to expert ratings and that also correlate significantly with different measures of psychopathy according to the results of a meta-analysis and different empirical studies are presented in bold.

**Table 3A**

*Correlation between the personality traits of psychopathy measured by the PPI-R and the NEO PI-R facets according to the results of López Penadés (2010)*

| PPI-R Traits                               | NEO PI-R Facets                                                                                                                               |
|--------------------------------------------|-----------------------------------------------------------------------------------------------------------------------------------------------|
| <b>Factor 1: Fearless Dominance</b>        |                                                                                                                                               |
| Social Influence                           | Activity<br><b>Warmth</b><br>Gregariousness<br>Assertiveness<br>Positive Emotions<br>Self-Consciousness (-)<br>Feelings<br><b>Modesty (-)</b> |
| Fearlessness                               | <b>Excitement-Seeking</b><br>Activity<br>Feelings                                                                                             |
| Stress Immunity                            | Anxiety (-)<br>Depression (-)<br>Self-Consciousness (-)<br>Vulnerability (-)                                                                  |
| <b>Factor 2: Self-Centered Impulsivity</b> |                                                                                                                                               |
| Machiavellian egocentricity                | <b>Modesty (-)</b><br><b>Altruism (-)</b><br>Trust (-)                                                                                        |
| Rebellious Nonconformity                   | <b>Excitement-Seeking</b><br>Feelings                                                                                                         |
| Blame Externalization                      | Trust (-) <sup>a</sup>                                                                                                                        |

| PPI-R Traits              | NEO PI-R Facets                                                                                                                            |
|---------------------------|--------------------------------------------------------------------------------------------------------------------------------------------|
| Carefree Nonplanfulness   | Achievement Striving (-)<br><b>Dutifulness (-)</b><br><b>Deliberation (-)</b><br><b>Self-Discipline (-)</b><br>Competence (-)<br>Order (-) |
| Factor 3: Coldheartedness | <b>Altruism (-)</b><br><b>Tender-Mindedness (-)</b><br><b>Modesty (-)</b><br>Anxiety (-)<br>Depression (-)                                 |

*Note.* The NEO PI-R facets that had significant correlations of at least a moderate size ( $\geq |.$

30|) with each of the scales of the PPI-R in the study of López Penadés (2010) with a sample of 320 Spanish university students are shown. The NEO PI-R facets are presented in bold that, according to the results of Lynam et al. (2018), coincide with the prototype of the psychopath according to expert ratings and with the results of content analysis and that also correlate significantly with different measures of psychopathy according to the results of a meta-analysis and different empirical studies. <sup>a</sup>In the case of the Blame Externalization scale, the only NEO PI-R facet that, in the study of López Penadés (2010), showed a significant correlation of moderate size with that scale was the depression facet, with a positive correlation of .30; however, the second facet of the NEO PI-R with a greater correlation with the scale of Blame Externalization was the trust facet, with a significant and negative correlation of almost moderate size (-.29), and, as its content in the negative sense is more theoretically related to the scale of Blame Externalization than the content of the facet of depression in a positive sense, we decided to replace this facet with the trust facet.

**Table 4A**

*Correlation between the personality traits of psychopathy measured by the TriPM and the NEO PI-R facets according to the results of Poy et al. (2014)*

| TriPM Traits  | NEO PI-R Facets                                                                                                                                                                                                                   |
|---------------|-----------------------------------------------------------------------------------------------------------------------------------------------------------------------------------------------------------------------------------|
| Boldness      | Assertiveness<br>Self-Consciousness (-)<br>Vulnerability (-)<br>Depression (-)<br>Anxiety (-)<br>Positive Emotions<br>Activity<br>Trust (-)<br>Actions<br><b>Modesty (-)</b><br><b>Warmth</b>                                     |
| Meanness      | <b>Altruism (-)</b><br><b>Compliance (-)</b><br><b>Dutifulness (-)</b><br><b>Straightforwardness (-)</b>                                                                                                                          |
| Disinhibition | <b>Deliberation (-)</b><br><b>Dutifulness (-)</b><br>Competence (-)<br><b>Self-Disciplines (-)</b><br><b>Impulsivity</b><br>Angry Hostility<br>Depression<br>Trust (-)<br><b>Compliance (-)</b><br><b>Straightforwardness (-)</b> |

*Note.* The NEO PI-R facets are shown that presented, both in men and women, significant

correlations of at least a moderate size ( $\geq |.30|$ ) with each of the scales of the TriPM

in the study of Poy et al. (2014) with a sample of Spanish university students, 253

women and 96 men. In bold are presented the NEO PI-R facets that, according to the results of Lynam et al. (2018), coincide with the prototype according to expert ratings and with the results of content analysis and that also correlate significantly with different measures of psychopathy according to the results of a meta-analysis and different empirical studies.

**Table 5A**

*Correlation between the personality traits of psychopathy measured by the PID-5 and the NEO PI-R facets according to the results of García et al. (2021, Supplementary material)*

| PID-5 Traits                    | NEO PI-R Facets                                                                                                                                                  |
|---------------------------------|------------------------------------------------------------------------------------------------------------------------------------------------------------------|
| Antisocial Personality Disorder |                                                                                                                                                                  |
| Manipulativeness                | <b>Straightforwardness (-)</b><br><b>Modesty (-)</b>                                                                                                             |
| Callousness                     | <b>Altruism (-)</b><br><b>Straightforwardness (-)</b><br><b>Warmth (-)</b><br><b>Compliance (-)</b><br>Trust (-)                                                 |
| Deceitfulness                   | <b>Straightforwardness (-)</b><br><b>Modesty (-)</b><br><b>Dutifulness (-)</b><br><b>Altruism (-)</b>                                                            |
| Hostility                       | Angry Hostility<br><b>Compliance (-)</b>                                                                                                                         |
| Risk-Taking                     | <b>Excitement-Seeking</b><br><b>Deliberation (-)</b>                                                                                                             |
| Impulsivity                     | <b>Deliberation (-)</b><br><b>Impulsivity</b><br>Competence (-)<br>Angry Hostility                                                                               |
| Irresponsibility                | <b>Dutifulness (-)</b><br><b>Self-Discipline (-)</b><br>Competence (-)<br><b>Deliberation (-)</b><br><b>Impulsivity</b><br>Order (-)<br>Achievement Striving (-) |
| Psychopathy Specifier           |                                                                                                                                                                  |

| PID-5 Traits      | NEO PI-R Facets                                                                               |
|-------------------|-----------------------------------------------------------------------------------------------|
| Low Anxiousness   | Anxiety (-)<br>Depression (-)<br>Vulnerability (-)<br>Self-Consciousness (-)<br>Hostility (-) |
| Low Withdrawal    | <b>Warmth</b><br>Gregariousness<br>Positive Emotions                                          |
| Attention Seeking | <b>Modesty (-)</b><br><b>Straightforwardness (-)</b>                                          |

*Note.* The NEO PI-R facets are shown that presented significant correlations and of at least a moderate to large size ( $\geq |.40|$ ) with each of the PID-5 scales in the study of García et al. (2021, Supplementary material) with a sample of 1052 people from the general Spanish population aged between 16 and 89 years. In bold are presented the NEO PI-R facets that, according to the results of Lynam et al. (2018), coincide with the prototype according to expert ratings and with the results of content analysis and that also correlate significantly with different measures of psychopathy according to the results of a meta-analysis and different empirical studies.

**Table 6A**

*Summary of the NEO PI-R facets that make up each definition of psychopathy and, where appropriate, correspondence of the NEO PI-R facets with the personality traits of the different models of psychopathy*

| Facets of NEO PI-R  | Definition of psychopathy |                          |                                                  |                                         |                 |                  |
|---------------------|---------------------------|--------------------------|--------------------------------------------------|-----------------------------------------|-----------------|------------------|
|                     | Meta-analyses             | Consistent among methods | Hare's model                                     | Lilienfeld's model                      | Triarchic model | DSM-5 model      |
| Anxiety             |                           |                          |                                                  | Stress immunity                         |                 | Low anxiousness  |
| Angry Hostility     | X                         |                          |                                                  |                                         |                 | Hostility        |
| Self-Consciousness  |                           |                          | Glibness/superficial charm                       |                                         | Boldness        |                  |
| Impulsivity         | X                         | X                        | Impulsivity                                      |                                         |                 |                  |
| Vulnerability       |                           |                          |                                                  |                                         | Boldness        |                  |
| Warmth              | X                         | X                        | Emotional shallow                                | Social influence                        |                 | Low withdrawal   |
| Assertiveness       |                           |                          |                                                  |                                         | Boldness        |                  |
| Excitement-Seeking  | X                         | X                        | Need of stimulation/proneness to boredom         | Fearlessness<br>Impulsive nonconformity |                 | Risk-taking      |
| Trust               | X                         | X                        | Failure to accept responsibility for own actions | Blame externalization                   |                 |                  |
| Straightforwardness | X                         | X                        | Pathological lying                               |                                         | Meanness        | Manipulativeness |
| Altruism            | X                         | X                        | Conning/manipulative                             | Coldheartedness                         | Meanness        | Callousness      |

| Facets of NEO PI-R      | Definition of psychopathy |                          |                                                     |                             |                 |                                    |
|-------------------------|---------------------------|--------------------------|-----------------------------------------------------|-----------------------------|-----------------|------------------------------------|
|                         | Meta-analyses             | Consistent among methods | Hare's model                                        | Lilienfeld's model          | Triarchic model | DSM-5 model                        |
| Compliance              | X                         | X                        | Failure to accept responsibility for own actions    |                             | Meanness        |                                    |
| Modesty                 | X                         | X                        | Grandiose sense of self-worth                       | Machiavellian egocentricity |                 | Deceitfulness<br>Attention seeking |
| Tender-Mindedness       | X                         | X                        | Lack of remorse or guilt<br>Callous/lack of empathy |                             |                 |                                    |
| Dutifulness             | X                         | X                        | Irresponsibility                                    | Carefree nonplanfulness     | Disinhibition   | Irresponsibility                   |
| Self-Discipline         | X                         | X                        | Lack of realistic, long-term goals                  |                             | Disinhibition   |                                    |
| Deliberation            | X                         | X                        | Poor behavioral control                             |                             | Disinhibition   | Impulsivity                        |
| No. of NEO PI-R facets: | 13                        | 12                       | 13                                                  | 7                           | 9               | 9                                  |

## References

- Decuyper, M., De Pauw, S., De Fruyt, F., De Bolle, M., & De Clercq, B. J. (2009). A meta-analysis of psychopathy-, antisocial PD- and FFM associations. *European Journal of Personality*, 23(7), 531-565. <http://dx.doi.org/10.1002/per.729>
- Derefinko, K., & Lynam, D. R. (2013). Psychopathy from the perspective of the five-factor model of personality. In T. A. Widiger & P. T. Costa, Jr. (Eds.), *Personality disorders and the five-factor model of personality* (pp. 103-117). American Psychological Association. <https://doi.org/10.1037/13939-007>
- García, L. F., Cuevas, L., Lucas, I., & Aluja, A. (2021). Comparing the prediction of dimensional personality disorders (PID-5) after three personality trait models: Five factor, Zuckerman, and Cloninger models. *European Journal of Psychological Assessment*, 37(3), 167-177. <http://dx.doi.org/10.1027/1015-5759/a000601>
- López Penadés, R. (2010). *Déficit en el sistema motivacional aversivo en psicópatas subclínicos evaluados mediante el Psychopathic Personality Inventory-Revised (PPI-R)* [Deficit in the aversive motivational system in subclinical psychopaths assessed by the Psychopathic Personality Inventory-Revised (PPI-R)] (Tesis doctoral, Universitat Jaume I). <http://hdl.handle.net/10803/384630>
- Lynam, D. R., & Miller, J. D. (2015). Psychopathy from a basic trait perspective: The utility of a five-factor model approach. *Journal of Personality*, 83(6), 611-626. <https://doi.org/10.1111/jopy.12132>
- Lynam, D. R., Miller, J. D., & Derefinko, K. J. (2018). Psychopathy and personality: An articulation of the benefits of a trait-based approach. In C. J. Patrick (Ed.), *Handbook of psychopathy* (2<sup>nd</sup> ed., pp. 259-280). The Guilford Press.
- O'Boyle, E. H., Forsyth, D. R., Banks, G. C., Story, P. A., & White, C. D. (2015). A meta-analytic test of redundancy and relative importance of the dark triad and five-factor

model of personality. *Journal of Personality*, 83(6), 644-664.

<http://dx.doi.org/10.1111/jopy.12126>

Poy, R., Segarra, P., Esteller, À., López, R., & Moltó, J. (2014). FFM description of the triarchic conceptualization of psychopathy in men and women. *Psychological Assessment*, 26(1), 69-76. <http://dx.doi.org/10.1037/a0034642>

Widiger, T. A., & Lynam, D. R. (1998). Psychopathy and the five-factor model of personality. In T. Millon, E. Simonsen, M. Birket-Smith & R. D. Davis (Eds.), *Psychopathy: Antisocial, criminal, and violent behavior* (pp. 171-187). The Guilford Press.
